# Supplementary material
Source: PubMed Central journal article supplement (PMC7428199)
Supplement: NIHMS1597910-supplement-Figure_S1__Table_S1.pdf [file NIHMS1597910-supplement-Figure_S1__Table_S1.pdf]

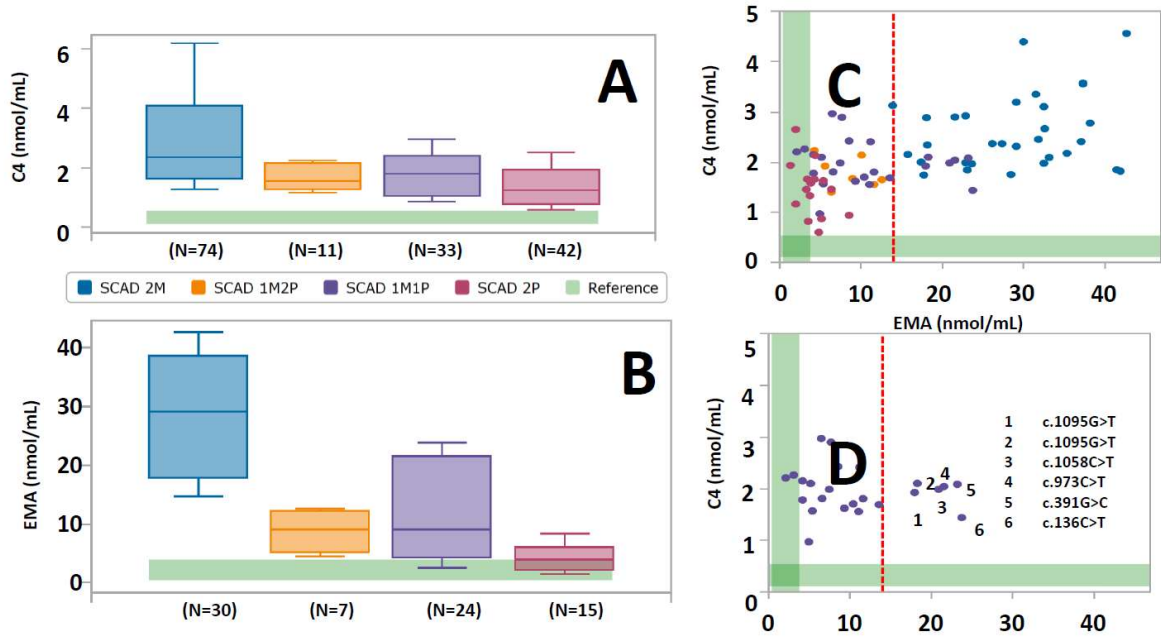

**Figure S1.** Comparison of C4 and EMA in SCAD(2M), SCAD(1M2P), SCAD(1M1P), and SCAD(2P). Panels A and B are reference distributions for C4 and EMA from CLIR. Panel C is the scatter plot of the data from the study. Panel D is the same plot for the SCAD(1M1P) subset. The six marked are compound heterozygotes between c.625G>A and the variants listed.

**Table S1.** ACADS variants found in study population.

| ID      | Genotype         | # of                     | # of                     | ACADS Variants Flagged by<br>AA10.1 Pipeline (Counts) |
|---------|------------------|--------------------------|--------------------------|-------------------------------------------------------|
|         |                  | ACADS:c.625G>A<br>Copies | ACADS:c.511C>T<br>Copies |                                                       |
| SCAD_01 | No SCAD Variants | 0                        | 0                        |                                                       |
| SCAD_02 | SCAD(1M1P)       | 1                        | 0                        | c.889C>T (1),                                         |
| SCAD_03 | SCAD(1M1P)       | 1                        | 0                        | c.326_328del (1),                                     |
| SCAD_04 | SCAD(1M1P)       | 1                        | 0                        | c.934-2A>G (1),                                       |
| SCAD_05 | SCAD(1M1P)       | 1                        | 0                        | c.409C>T (1),                                         |
| SCAD_06 | SCAD(1M1P)       | 1                        | 0                        | c.1058C>T (1),                                        |
| SCAD_07 | SCAD(1M1P)       | 1                        | 0                        | c.1138C>T (1),                                        |
| SCAD_08 | SCAD(1M1P)       | 1                        | 0                        | c.1138C>T (1),                                        |
| SCAD_09 | SCAD(1M1P)       | 1                        | 0                        | c.1095G>T (1),                                        |
| SCAD_10 | SCAD(1M1P)       | 1                        | 0                        | c.529T>C (1),                                         |
| SCAD_11 | SCAD(1M1P)       | 1                        | 0                        | c.529T>C (1),                                         |
| SCAD_12 | SCAD(1M1P)       | 1                        | 0                        | c.47-6C>A (1),                                        |
| SCAD_13 | SCAD(1M1P)       | 1                        | 0                        | c.1130C>T (1),                                        |
| SCAD_14 | SCAD(1M1P)       | 1                        | 0                        | c.136C>T (1),                                         |
| SCAD_15 | SCAD(1M1P)       | 1                        | 0                        | c.1095G>T (1),                                        |
| SCAD_16 | SCAD(1M1P)       | 1                        | 0                        | c.1192C>T (1),                                        |
| SCAD_17 | SCAD(1M1P)       | 1                        | 0                        | c.461T>G (1),                                         |
| SCAD_18 | SCAD(1M1P)       | 1                        | 0                        | c.508G>A (1),                                         |
| SCAD_19 | SCAD(1M1P)       | 1                        | 0                        | c.973C>T (1),                                         |
| SCAD_20 | SCAD(1M1P)       | 1                        | 0                        | c.268G>A (1),                                         |
| SCAD_21 | SCAD(1M1P)       | 1                        | 0                        | c.322G>A (1),                                         |
| SCAD_22 | SCAD(1M1P)       | 1                        | 0                        | c.529T>C (1),                                         |
| SCAD_23 | SCAD(1M1P)       | 1                        | 0                        | c.391G>C (1),                                         |
| SCAD_24 | SCAD(1M1P)       | 1                        | 0                        | c.529T>C (1),                                         |
| SCAD_25 | SCAD(1M1P)       | 1                        | 0                        | c.529T>C (1),                                         |
| SCAD_26 | SCAD(1M2P)       | 2                        | 0                        | c.973C>T (1),                                         |
| SCAD_27 | SCAD(1M2P)       | 2                        | 0                        | c.934-11G>A (1),                                      |
| SCAD_28 | SCAD(1M2P)       | 2                        | 0                        | c.1147C>T (1),                                        |
| SCAD_29 | SCAD(1M2P)       | 2                        | 0                        | c.973C>T (1),                                         |
| SCAD_30 | SCAD(1M2P)       | 2                        | 0                        | c.250G>A (1),                                         |
| SCAD_31 | SCAD(1M2P)       | 2                        | 0                        | c.1147C>T (1),                                        |
| SCAD_32 | SCAD(1M2P)       | 2                        | 0                        | c.280G>C (1),                                         |
| SCAD_33 | SCAD(1M2P)       | 2                        | 0                        | c.136C>T (1),                                         |
| SCAD_34 | SCAD(1P)         | 1                        | 0                        |                                                       |
| SCAD_35 | SCAD(2M)         | 0                        | 0                        | c.529T>C (2),                                         |
| SCAD_36 | SCAD(2M)         | 0                        | 0                        | c.529T>C (2),                                         |
| SCAD_37 | SCAD(2M)         | 0                        | 0                        | c.529T>C (2),                                         |
| SCAD_38 | SCAD(2M)         | 0                        | 0                        | c.529T>C (2),                                         |
| SCAD_39 | SCAD(2M)         | 0                        | 0                        | c.319C>T (2),                                         |
| SCAD_40 | SCAD(2M)         | 0                        | 0                        | c.529T>C (1), c.1039A>G (1),                          |
| SCAD_41 | SCAD(2M)         | 0                        | 0                        | c.1031+1A>G (1), c.1130C>T (1),                       |
| SCAD_42 | SCAD(2M)         | 0                        | 0                        | c.981_983del (1), c.1192C>T (1),                      |
| SCAD_43 | SCAD(2M)         | 0                        | 0                        | c.529T>C (1), c.988C>T (1),                           |
| SCAD_44 | SCAD(2M)         | 0                        | 0                        | c.1195C>T (2),                                        |
| SCAD_45 | SCAD(2M)         | 0                        | 0                        | c.529T>C (2),                                         |
| SCAD_46 | SCAD(2M)         | 0                        | 0                        | c.529T>C (2),                                         |
| SCAD_47 | SCAD(2M)         | 0                        | 0                        | c.529T>C (2),                                         |
| SCAD_48 | SCAD(2M)         | 0                        | 0                        | c.1195C>T (2),                                        |
| SCAD_49 | SCAD(2M)         | 0                        | 0                        | c.529T>C (1), c.988C>T (1),                           |
| SCAD_50 | SCAD(2M)         | 0                        | 0                        | c.508G>A (1), c.673G>C (1),                           |
| SCAD_51 | SCAD(2M)         | 0                        | 0                        | c.529T>C (2),                                         |
| SCAD_52 | SCAD(2M)         | 0                        | 0                        | c.529T>C (2),                                         |
| SCAD_53 | SCAD(2M)         | 0                        | 0                        | c.529T>C (1), c.988C>T (1),                           |
| SCAD_54 | SCAD(2M)         | 0                        | 0                        | c.1195C>T (2),                                        |

|         |            |   |   |                                 |
|---------|------------|---|---|---------------------------------|
| SCAD_55 | SCAD(2M)   | 0 | 0 | c.682G>A (1), c.1147C>T (1),    |
| SCAD_56 | SCAD(2M)   | 0 | 0 | c.529T>C (1), c.941_949del (1), |
| SCAD_57 | SCAD(2M)   | 0 | 0 | c.529T>C (2),                   |
| SCAD_58 | SCAD(2M1P) | 1 | 0 | c.203C>T (1), c.391G>C (1),     |
| SCAD_59 | SCAD(2M1P) | 1 | 0 | c.268G>A (1), c.1192C>T (1),    |
| SCAD_60 | SCAD(2M1P) | 1 | 0 | c.529T>C (1), c.1067C>T (1),    |
| SCAD_61 | SCAD(2M1P) | 1 | 0 | c.136C>T (1), c.934-5T>A (1),   |
| SCAD_62 | SCAD(2M2P) | 2 | 0 | c.596C>T (2),                   |
| SCAD_63 | SCAD(2M2P) | 2 | 0 | c.868G>C (2),                   |
| SCAD_64 | SCAD(2M2P) | 2 | 0 | c.136C>T (1), c.1153G>T (1),    |
| SCAD_65 | SCAD(2P)   | 2 | 0 |                                 |
| SCAD_66 | SCAD(2P)   | 2 | 0 |                                 |
| SCAD_67 | SCAD(2P)   | 2 | 0 |                                 |
| SCAD_68 | SCAD(2P)   | 2 | 0 |                                 |
| SCAD_69 | SCAD(2P)   | 2 | 0 |                                 |
| SCAD_70 | SCAD(2P)   | 2 | 0 |                                 |
| SCAD_71 | SCAD(2P)   | 2 | 0 |                                 |
| SCAD_72 | SCAD(2P)   | 2 | 0 |                                 |
| SCAD_73 | SCAD(2P)   | 2 | 0 |                                 |
| SCAD_74 | SCAD(2P)   | 2 | 0 |                                 |
